# Supplementary material for: Reactivation of Latent Epstein-Barr Virus: A Comparison after Exposure to Gamma, Proton, Carbon, and Iron Radiation
Source: PubMed Central journal article supplement (PMC6213004; doi:10.3390/ijms19102961), 2018-09-28
Supplement: ijms-19-02961-s001.pdf [file ijms-19-02961-s001.pdf]

*Supplementary Material for Statistical Analysis*

Viral Reactivation

| Radiation | dose | day | Estimated                |                |                |                | p-value  |
|-----------|------|-----|--------------------------|----------------|----------------|----------------|----------|
|           |      |     | Difference from Control* | standard error | lower 95% conf | upper 95% conf |          |
| Gamma     | 0.1  | 0   | 0.727                    | 0.207          | 0.317          | 1.137          | 0.000623 |
| Gamma     | 0.1  | 4   | 2.380                    | 0.207          | 1.970          | 2.790          | 2.40E-21 |
| Gamma     | 0.1  | 8   | 1.522                    | 0.207          | 1.112          | 1.932          | 2.23E-11 |
| Gamma     | 0.1  | 12  | 1.228                    | 0.207          | 0.818          | 1.638          | 2.72E-08 |
| Gamma     | 0.1  | 16  | 0.595                    | 0.207          | 0.185          | 1.005          | 0.004754 |
| Gamma     | 0.1  | 20  | 0.731                    | 0.207          | 0.321          | 1.141          | 0.000584 |
| Gamma     | 0.5  | 0   | 0.412                    | 0.385          | -0.350         | 1.173          | 0.286982 |
| Gamma     | 0.5  | 4   | 3.084                    | 0.385          | 2.322          | 3.846          | 6.51E-13 |
| Gamma     | 0.5  | 8   | 1.714                    | 0.385          | 0.952          | 2.475          | 1.85E-05 |
| Gamma     | 0.5  | 12  | 0.788                    | 0.385          | 0.027          | 1.550          | 0.042597 |
| Gamma     | 0.5  | 16  | 1.236                    | 0.385          | 0.475          | 1.998          | 0.001673 |
| Gamma     | 0.5  | 20  | 1.766                    | 0.385          | 1.004          | 2.528          | 1.07E-05 |
| Gamma     | 1    | 0   | 0.894                    | 0.230          | 0.440          | 1.349          | 0.00016  |
| Gamma     | 1    | 4   | 4.453                    | 0.230          | 3.999          | 4.908          | 0        |
| Gamma     | 1    | 8   | 1.746                    | 0.230          | 1.291          | 2.201          | 5.96E-12 |
| Gamma     | 1    | 12  | 1.799                    | 0.230          | 1.345          | 2.254          | 1.72E-12 |
| Gamma     | 1    | 16  | 2.129                    | 0.230          | 1.674          | 2.583          | 6.78E-16 |
| Gamma     | 1    | 20  | 1.903                    | 0.230          | 1.449          | 2.358          | 1.51E-13 |
| Gamma     | 2    | 0   | 0.578                    | 0.250          | 0.082          | 1.074          | 0.022669 |
| Gamma     | 2    | 4   | 4.465                    | 0.250          | 3.969          | 4.960          | 3.02E-36 |
| Gamma     | 2    | 8   | 4.074                    | 0.250          | 3.578          | 4.570          | 9.68E-33 |
| Gamma     | 2    | 12  | 2.119                    | 0.250          | 1.623          | 2.615          | 5.75E-14 |
| Gamma     | 2    | 16  | 1.493                    | 0.250          | 0.997          | 1.988          | 2.37E-08 |
| Gamma     | 2    | 20  | 1.802                    | 0.250          | 1.306          | 2.298          | 4.97E-11 |
| Proton    | 0.1  | 0   | -0.215                   | 0.207          | -0.625         | 0.195          | 0.301536 |
| Proton    | 0.1  | 4   | 1.479                    | 0.207          | 1.069          | 1.888          | 6.63E-11 |
| Proton    | 0.1  | 8   | 0.993                    | 0.207          | 0.583          | 1.403          | 4.53E-06 |
| Proton    | 0.1  | 12  | 0.996                    | 0.207          | 0.586          | 1.406          | 4.25E-06 |
| Proton    | 0.1  | 16  | 0.985                    | 0.207          | 0.575          | 1.395          | 5.31E-06 |
| Proton    | 0.1  | 20  | 0.605                    | 0.207          | 0.195          | 1.015          | 0.004152 |
| Proton    | 0.5  | 0   | 0.243                    | 0.385          | -0.519         | 1.005          | 0.529046 |
| Proton    | 0.5  | 4   | 2.002                    | 0.385          | 1.240          | 2.763          | 7.82E-07 |
| Proton    | 0.5  | 8   | 1.684                    | 0.385          | 0.922          | 2.446          | 2.52E-05 |
| Proton    | 0.5  | 12  | 2.042                    | 0.385          | 1.280          | 2.804          | 4.89E-07 |
| Proton    | 0.5  | 16  | -0.889                   | 0.385          | -1.651         | -0.128         | 0.02248  |
| Proton    | 0.5  | 20  | -0.167                   | 0.385          | -0.929         | 0.595          | 0.665027 |
| Proton    | 1    | 0   | -0.137                   | 0.230          | -0.592         | 0.317          | 0.551194 |
| Proton    | 1    | 4   | 2.795                    | 0.230          | 2.340          | 3.250          | 5.41E-23 |
| Proton    | 1    | 8   | 2.066                    | 0.230          | 1.611          | 2.521          | 3.08E-15 |
| Proton    | 1    | 12  | 1.875                    | 0.230          | 1.421          | 2.330          | 2.91E-13 |

|        |     |    |        |       |        |       |          |
|--------|-----|----|--------|-------|--------|-------|----------|
| Proton | 1   | 16 | 0.254  | 0.230 | -0.201 | 0.709 | 0.270755 |
| Proton | 1   | 20 | -0.185 | 0.230 | -0.640 | 0.269 | 0.421268 |
| Proton | 2   | 0  | 0.385  | 0.250 | -0.110 | 0.881 | 0.126443 |
| Proton | 2   | 4  | 3.399  | 0.250 | 2.904  | 3.895 | 2.07E-26 |
| Proton | 2   | 8  | 2.465  | 0.250 | 1.969  | 2.961 | 2.68E-17 |
| Proton | 2   | 12 | 2.494  | 0.250 | 1.998  | 2.990 | 1.40E-17 |
| Proton | 2   | 16 | 1.784  | 0.250 | 1.288  | 2.279 | 7.28E-11 |
| Proton | 2   | 20 | 1.678  | 0.250 | 1.182  | 2.174 | 6.29E-10 |
| Carbon | 0.1 | 0  | 0.283  | 0.232 | -0.176 | 0.741 | 0.224656 |
| Carbon | 0.1 | 4  | 1.264  | 0.232 | 0.806  | 1.722 | 2.45E-07 |
| Carbon | 0.1 | 8  | 0.585  | 0.232 | 0.127  | 1.044 | 0.012711 |
| Carbon | 0.1 | 12 | 0.662  | 0.232 | 0.203  | 1.120 | 0.005005 |
| Carbon | 0.1 | 16 | 1.260  | 0.232 | 0.801  | 1.718 | 2.68E-07 |
| Carbon | 0.1 | 20 | 0.996  | 0.232 | 0.538  | 1.454 | 3.37E-05 |
| Carbon | 0.5 | 0  | 0.254  | 0.430 | -0.598 | 1.106 | 0.555907 |
| Carbon | 0.5 | 4  | 1.423  | 0.430 | 0.571  | 2.275 | 0.001231 |
| Carbon | 0.5 | 8  | 1.055  | 0.430 | 0.203  | 1.906 | 0.01563  |
| Carbon | 0.5 | 12 | 1.233  | 0.430 | 0.381  | 2.084 | 0.004893 |
| Carbon | 0.5 | 16 | 0.992  | 0.430 | 0.141  | 1.844 | 0.022767 |
| Carbon | 0.5 | 20 | 1.320  | 0.430 | 0.469  | 2.172 | 0.002638 |
| Carbon | 1   | 0  | 0.009  | 0.257 | -0.500 | 0.517 | 0.97303  |
| Carbon | 1   | 4  | 1.551  | 0.257 | 1.043  | 2.060 | 1.62E-08 |
| Carbon | 1   | 8  | 1.088  | 0.257 | 0.580  | 1.597 | 4.36E-05 |
| Carbon | 1   | 12 | 1.319  | 0.257 | 0.810  | 1.827 | 1.05E-06 |
| Carbon | 1   | 16 | 1.199  | 0.257 | 0.690  | 1.707 | 7.74E-06 |
| Carbon | 1   | 20 | 1.168  | 0.257 | 0.660  | 1.676 | 1.26E-05 |
| Carbon | 2   | 0  | 0.169  | 0.280 | -0.385 | 0.723 | 0.547654 |
| Carbon | 2   | 4  | 1.699  | 0.280 | 1.145  | 2.254 | 1.41E-08 |
| Carbon | 2   | 8  | 1.106  | 0.280 | 0.551  | 1.660 | 0.00013  |
| Carbon | 2   | 12 | 1.013  | 0.280 | 0.459  | 1.567 | 0.00043  |
| Carbon | 2   | 16 | 1.023  | 0.280 | 0.469  | 1.577 | 0.000378 |
| Carbon | 2   | 20 | 0.981  | 0.280 | 0.427  | 1.536 | 0.000635 |
| Iron   | 0.1 | 0  | 0.135  | 0.232 | -0.323 | 0.594 | 0.559999 |
| Iron   | 0.1 | 4  | 1.489  | 0.232 | 1.031  | 1.948 | 2.38E-09 |
| Iron   | 0.1 | 8  | 0.517  | 0.232 | 0.059  | 0.976 | 0.027269 |
| Iron   | 0.1 | 12 | 1.572  | 0.232 | 1.114  | 2.030 | 4.00E-10 |
| Iron   | 0.1 | 16 | 0.985  | 0.232 | 0.527  | 1.443 | 4.06E-05 |
| Iron   | 0.1 | 20 | 0.517  | 0.232 | 0.059  | 0.975 | 0.027356 |
| Iron   | 0.5 | 0  | -0.157 | 0.430 | -1.009 | 0.695 | 0.716015 |
| Iron   | 0.5 | 4  | 0.831  | 0.430 | -0.021 | 1.682 | 0.05583  |
| Iron   | 0.5 | 8  | 0.283  | 0.430 | -0.569 | 1.134 | 0.512238 |
| Iron   | 0.5 | 12 | 0.709  | 0.430 | -0.143 | 1.561 | 0.101956 |
| Iron   | 0.5 | 16 | 0.357  | 0.430 | -0.494 | 1.209 | 0.407759 |
| Iron   | 0.5 | 20 | 0.508  | 0.430 | -0.344 | 1.359 | 0.240282 |
| Iron   | 1   | 0  | -0.092 | 0.257 | -0.600 | 0.416 | 0.720619 |
| Iron   | 1   | 4  | 1.210  | 0.257 | 0.702  | 1.718 | 6.44E-06 |
| Iron   | 1   | 8  | 1.038  | 0.257 | 0.529  | 1.546 | 9.26E-05 |

|      |   |    |       |       |        |       |          |
|------|---|----|-------|-------|--------|-------|----------|
| Iron | 1 | 12 | 0.399 | 0.257 | -0.110 | 0.907 | 0.123324 |
| Iron | 1 | 16 | 0.969 | 0.257 | 0.461  | 1.477 | 0.000248 |
| Iron | 1 | 20 | 0.875 | 0.257 | 0.367  | 1.384 | 0.00088  |
| Iron | 2 | 0  | 0.015 | 0.280 | -0.540 | 0.569 | 0.958216 |
| Iron | 2 | 4  | 1.509 | 0.280 | 0.955  | 2.063 | 3.38E-07 |
| Iron | 2 | 8  | 1.051 | 0.280 | 0.497  | 1.605 | 0.000265 |
| Iron | 2 | 12 | 0.809 | 0.280 | 0.255  | 1.363 | 0.004546 |
| Iron | 2 | 16 | 0.812 | 0.280 | 0.258  | 1.366 | 0.004402 |
| Iron | 2 | 20 | 0.605 | 0.280 | 0.050  | 1.159 | 0.032724 |

\* change in median log EBV DNA copies per nanogram of DNA

| Cell Viability |      |     |                                    |                |                |                |          |
|----------------|------|-----|------------------------------------|----------------|----------------|----------------|----------|
| Radiation      | dose | day | Estimated Difference from Control* | standard error | lower 95% conf | upper 95% conf | p-value  |
| Gamma          | 0.1  | 0   | -0.188                             | 0.593          | -1.365         | 0.989          | 0.751873 |
| Gamma          | 0.1  | 4   | -0.817                             | 0.593          | -1.994         | 0.360          | 0.171702 |
| Gamma          | 0.1  | 8   | -2.057                             | 0.593          | -3.234         | -0.880         | 0.000777 |
| Gamma          | 0.1  | 12  | 1.559                              | 0.593          | 0.381          | 2.736          | 0.009973 |
| Gamma          | 0.1  | 16  | 1.131                              | 0.593          | -0.046         | 2.308          | 0.05947  |
| Gamma          | 0.1  | 20  | 0.644                              | 0.593          | -0.534         | 1.821          | 0.280731 |
| Gamma          | 0.5  | 0   | -0.421                             | 0.425          | -1.265         | 0.422          | 0.324297 |
| Gamma          | 0.5  | 4   | -0.804                             | 0.425          | -1.648         | 0.039          | 0.06151  |
| Gamma          | 0.5  | 8   | -1.072                             | 0.425          | -1.916         | -0.229         | 0.013248 |
| Gamma          | 0.5  | 12  | 1.576                              | 0.425          | 0.732          | 2.419          | 0.000344 |
| Gamma          | 0.5  | 16  | 0.745                              | 0.425          | -0.098         | 1.589          | 0.082638 |
| Gamma          | 0.5  | 20  | -0.533                             | 0.425          | -1.377         | 0.310          | 0.212823 |
| Gamma          | 1    | 0   | -0.541                             | 0.483          | -1.500         | 0.418          | 0.265567 |
| Gamma          | 1    | 4   | -0.868                             | 0.461          | -1.782         | 0.046          | 0.062581 |
| Gamma          | 1    | 8   | -1.097                             | 0.461          | -2.012         | -0.183         | 0.019133 |
| Gamma          | 1    | 12  | 1.208                              | 0.461          | 0.293          | 2.122          | 0.010135 |
| Gamma          | 1    | 16  | 0.776                              | 0.461          | -0.138         | 1.691          | 0.09522  |
| Gamma          | 1    | 20  | -0.177                             | 0.461          | -1.092         | 0.737          | 0.701123 |
| Gamma          | 2    | 0   | 0.441                              | 0.529          | -0.609         | 1.490          | 0.406769 |
| Gamma          | 2    | 4   | -1.523                             | 0.504          | -2.524         | -0.522         | 0.003208 |
| Gamma          | 2    | 8   | -1.153                             | 0.504          | -2.153         | -0.152         | 0.024393 |
| Gamma          | 2    | 12  | 1.376                              | 0.504          | 0.376          | 2.377          | 0.007504 |
| Gamma          | 2    | 16  | 0.766                              | 0.504          | -0.235         | 1.767          | 0.132068 |
| Gamma          | 2    | 20  | 0.008                              | 0.504          | -0.992         | 1.009          | 0.987032 |
| Proton         | 0.1  | 0   | -0.668                             | 0.593          | -1.845         | 0.509          | 0.263034 |
| Proton         | 0.1  | 4   | -0.994                             | 0.663          | -2.310         | 0.322          | 0.137164 |
| Proton         | 0.1  | 8   | -2.210                             | 0.593          | -3.387         | -1.033         | 0.000324 |
| Proton         | 0.1  | 12  | 1.550                              | 0.593          | 0.373          | 2.727          | 0.010369 |
| Proton         | 0.1  | 16  | 0.787                              | 0.593          | -0.391         | 1.964          | 0.187985 |
| Proton         | 0.1  | 20  | 0.643                              | 0.593          | -0.534         | 1.821          | 0.280818 |

|        |     |    |        |       |        |        |          |
|--------|-----|----|--------|-------|--------|--------|----------|
| Proton | 0.5 | 0  | -0.469 | 0.425 | -1.312 | 0.375  | 0.272936 |
| Proton | 0.5 | 4  | -1.264 | 0.425 | -2.108 | -0.421 | 0.003678 |
| Proton | 0.5 | 8  | -1.829 | 0.425 | -2.673 | -0.986 | 0.000039 |
| Proton | 0.5 | 12 | 2.094  | 0.425 | 1.251  | 2.938  | 3.27E-06 |
| Proton | 0.5 | 16 | 0.766  | 0.410 | -0.047 | 1.579  | 0.064507 |
| Proton | 0.5 | 20 | 0.025  | 0.446 | -0.860 | 0.910  | 0.955318 |
| Proton | 1   | 0  | -0.487 | 0.461 | -1.402 | 0.427  | 0.292727 |
| Proton | 1   | 4  | -1.811 | 0.461 | -2.725 | -0.897 | 0.000156 |
| Proton | 1   | 8  | -1.748 | 0.461 | -2.663 | -0.834 | 0.000253 |
| Proton | 1   | 12 | 1.683  | 0.461 | 0.768  | 2.597  | 0.000416 |
| Proton | 1   | 16 | 0.630  | 0.461 | -0.284 | 1.544  | 0.174718 |
| Proton | 1   | 20 | 0.444  | 0.461 | -0.471 | 1.358  | 0.33809  |
| Proton | 2   | 0  | -0.321 | 0.504 | -1.322 | 0.680  | 0.526209 |
| Proton | 2   | 4  | -2.045 | 0.504 | -3.046 | -1.044 | 9.92E-05 |
| Proton | 2   | 8  | -1.865 | 0.504 | -2.866 | -0.864 | 0.000355 |
| Proton | 2   | 12 | 1.461  | 0.504 | 0.460  | 2.461  | 0.004641 |
| Proton | 2   | 16 | 0.603  | 0.504 | -0.398 | 1.604  | 0.234828 |
| Proton | 2   | 20 | 0.344  | 0.504 | -0.657 | 1.345  | 0.496916 |
| Carbon | 0.1 | 0  | -1.062 | 0.839 | -2.727 | 0.603  | 0.208529 |
| Carbon | 0.1 | 4  | -0.929 | 0.839 | -2.594 | 0.736  | 0.270856 |
| Carbon | 0.1 | 8  | 0.992  | 0.839 | -0.673 | 2.657  | 0.239821 |
| Carbon | 0.1 | 12 | 2.032  | 0.839 | 0.367  | 3.697  | 0.017265 |
| Carbon | 0.1 | 16 | 0.677  | 0.839 | -0.988 | 2.342  | 0.421672 |
| Carbon | 0.1 | 20 | 0.399  | 0.839 | -1.266 | 2.063  | 0.635857 |
| Carbon | 0.5 | 0  | -0.999 | 0.601 | -2.192 | 0.194  | 0.099876 |
| Carbon | 0.5 | 4  | -1.430 | 0.601 | -2.623 | -0.237 | 0.019263 |
| Carbon | 0.5 | 8  | -0.352 | 0.601 | -1.545 | 0.841  | 0.560096 |
| Carbon | 0.5 | 12 | 1.768  | 0.601 | 0.575  | 2.962  | 0.004059 |
| Carbon | 0.5 | 16 | -0.576 | 0.601 | -1.769 | 0.617  | 0.340724 |
| Carbon | 0.5 | 20 | 0.147  | 0.601 | -1.046 | 1.340  | 0.807354 |
| Carbon | 1   | 0  | -1.333 | 0.652 | -2.626 | -0.040 | 0.043424 |
| Carbon | 1   | 4  | -1.514 | 0.652 | -2.807 | -0.221 | 0.022207 |
| Carbon | 1   | 8  | -1.053 | 0.652 | -2.346 | 0.240  | 0.109305 |
| Carbon | 1   | 12 | 1.819  | 0.652 | 0.526  | 3.112  | 0.006287 |
| Carbon | 1   | 16 | 0.490  | 0.652 | -0.803 | 1.783  | 0.453619 |
| Carbon | 1   | 20 | 0.323  | 0.652 | -0.970 | 1.616  | 0.621133 |
| Carbon | 2   | 0  | -1.333 | 0.713 | -2.748 | 0.082  | 0.064596 |
| Carbon | 2   | 4  | -1.406 | 0.713 | -2.822 | 0.009  | 0.051418 |
| Carbon | 2   | 8  | -1.014 | 0.713 | -2.430 | 0.401  | 0.158199 |
| Carbon | 2   | 12 | 1.779  | 0.713 | 0.363  | 3.194  | 0.014293 |
| Carbon | 2   | 16 | 0.192  | 0.713 | -1.224 | 1.607  | 0.788825 |
| Carbon | 2   | 20 | 0.292  | 0.713 | -1.123 | 1.707  | 0.683418 |
| Iron   | 0.1 | 0  | -0.515 | 0.839 | -2.179 | 1.150  | 0.541038 |
| Iron   | 0.1 | 4  | -1.496 | 0.839 | -3.160 | 0.169  | 0.077717 |
| Iron   | 0.1 | 8  | -1.851 | 0.839 | -3.516 | -0.187 | 0.029644 |
| Iron   | 0.1 | 12 | 2.289  | 0.839 | 0.625  | 3.954  | 0.00752  |
| Iron   | 0.1 | 16 | 0.756  | 0.839 | -0.909 | 2.421  | 0.369961 |

|      |     |    |        |       |        |        |          |
|------|-----|----|--------|-------|--------|--------|----------|
| Iron | 0.1 | 20 | 0.344  | 0.839 | -1.321 | 2.009  | 0.682748 |
| Iron | 0.5 | 0  | -0.515 | 0.601 | -1.708 | 0.678  | 0.394189 |
| Iron | 0.5 | 4  | -1.635 | 0.601 | -2.828 | -0.442 | 0.007705 |
| Iron | 0.5 | 8  | -0.967 | 0.601 | -2.160 | 0.225  | 0.110799 |
| Iron | 0.5 | 12 | 1.830  | 0.601 | 0.637  | 3.022  | 0.002989 |
| Iron | 0.5 | 16 | 0.449  | 0.601 | -0.744 | 1.642  | 0.456984 |
| Iron | 0.5 | 20 | -0.155 | 0.601 | -1.348 | 1.038  | 0.796694 |
| Iron | 1   | 0  | 0.224  | 0.652 | -1.069 | 1.517  | 0.732005 |
| Iron | 1   | 4  | -1.915 | 0.652 | -3.208 | -0.622 | 0.004095 |
| Iron | 1   | 8  | -2.827 | 0.652 | -4.120 | -1.534 | 3.42E-05 |
| Iron | 1   | 12 | 1.861  | 0.652 | 0.568  | 3.154  | 0.005222 |
| Iron | 1   | 16 | 0.667  | 0.652 | -0.626 | 1.960  | 0.308289 |
| Iron | 1   | 20 | -0.040 | 0.652 | -1.333 | 1.253  | 0.950854 |
| Iron | 2   | 0  | 0.309  | 0.713 | -1.106 | 1.724  | 0.665908 |
| Iron | 2   | 4  | -1.536 | 0.713 | -2.952 | -0.121 | 0.033629 |
| Iron | 2   | 8  | -3.561 | 0.713 | -4.976 | -2.146 | 2.50E-06 |
| Iron | 2   | 12 | 1.550  | 0.713 | 0.135  | 2.965  | 0.032147 |
| Iron | 2   | 16 | 0.198  | 0.713 | -1.217 | 1.613  | 0.781687 |
| Iron | 2   | 20 | 0.644  | 0.713 | -0.771 | 2.059  | 0.369092 |

\* change in median logit cell viability proportion

| Cell Size |      |     |                                             |                   |                   |                   |         |
|-----------|------|-----|---------------------------------------------|-------------------|-------------------|-------------------|---------|
| Radiation | dose | day | Estimated<br>Difference<br>from<br>Control* | standard<br>error | lower 95%<br>conf | upper<br>95% conf | p-value |
| Gamma     | 0.1  | 0   | 0.799                                       | 0.753             | -0.694            | 2.292             | 0.2911  |
| Gamma     | 0.1  | 4   | 0.300                                       | 0.753             | -1.193            | 1.792             | 0.6914  |
| Gamma     | 0.1  | 8   | -1.300                                      | 0.753             | -2.793            | 0.193             | 0.0872  |
| Gamma     | 0.1  | 12  | -0.201                                      | 0.753             | -1.694            | 1.292             | 0.7900  |
| Gamma     | 0.1  | 16  | 1.002                                       | 0.753             | -0.491            | 2.495             | 0.1862  |
| Gamma     | 0.1  | 20  | -0.755                                      | 0.753             | -2.248            | 0.738             | 0.3182  |
| Gamma     | 0.5  | 0   | 0.897                                       | 0.789             | -0.667            | 2.461             | 0.2579  |
| Gamma     | 0.5  | 4   | -0.597                                      | 0.752             | -2.088            | 0.895             | 0.4291  |
| Gamma     | 0.5  | 8   | -2.000                                      | 0.752             | -3.492            | -0.509            | 0.0091  |
| Gamma     | 0.5  | 12  | -1.202                                      | 0.752             | -2.694            | 0.289             | 0.1129  |
| Gamma     | 0.5  | 16  | 1.200                                       | 0.752             | -0.292            | 2.692             | 0.1136  |
| Gamma     | 0.5  | 20  | 0.301                                       | 0.752             | -1.191            | 1.792             | 0.6899  |
| Gamma     | 1    | 0   | 0.999                                       | 0.694             | -0.379            | 2.377             | 0.1533  |
| Gamma     | 1    | 4   | -0.398                                      | 0.694             | -1.776            | 0.980             | 0.5679  |
| Gamma     | 1    | 8   | -1.100                                      | 0.694             | -2.478            | 0.278             | 0.1164  |
| Gamma     | 1    | 12  | -1.498                                      | 0.694             | -2.876            | -0.120            | 0.0335  |
| Gamma     | 1    | 16  | -1.199                                      | 0.694             | -2.577            | 0.179             | 0.0873  |
| Gamma     | 1    | 20  | -0.415                                      | 0.694             | -1.793            | 0.963             | 0.5512  |
| Gamma     | 2    | 0   | 1.699                                       | 0.719             | 0.272             | 3.125             | 0.0201  |
| Gamma     | 2    | 4   | 0.502                                       | 0.686             | -0.858            | 1.862             | 0.4658  |
| Gamma     | 2    | 8   | -0.199                                      | 0.686             | -1.560            | 1.161             | 0.7718  |
| Gamma     | 2    | 12  | 0.300                                       | 0.686             | -1.060            | 1.661             | 0.6623  |

|        |     |    |        |       |        |       |        |
|--------|-----|----|--------|-------|--------|-------|--------|
| Gamma  | 2   | 16 | -0.302 | 0.686 | -1.662 | 1.059 | 0.6611 |
| Gamma  | 2   | 20 | -0.164 | 0.719 | -1.591 | 1.263 | 0.8199 |
| Proton | 0.1 | 0  | 0.799  | 0.753 | -0.694 | 2.292 | 0.2910 |
| Proton | 0.1 | 4  | 1.301  | 0.753 | -0.192 | 2.793 | 0.0870 |
| Proton | 0.1 | 8  | 0.299  | 0.753 | -1.194 | 1.791 | 0.6925 |
| Proton | 0.1 | 12 | 0.901  | 0.753 | -0.592 | 2.394 | 0.2340 |
| Proton | 0.1 | 16 | 1.499  | 0.753 | 0.006  | 2.992 | 0.0490 |
| Proton | 0.1 | 20 | 1.001  | 0.753 | -0.492 | 2.494 | 0.1864 |
| Proton | 0.5 | 0  | 1.400  | 0.752 | -0.091 | 2.891 | 0.0655 |
| Proton | 0.5 | 4  | 0.800  | 0.752 | -0.691 | 2.291 | 0.2896 |
| Proton | 0.5 | 8  | -0.201 | 0.752 | -1.692 | 1.290 | 0.7894 |
| Proton | 0.5 | 12 | 0.600  | 0.752 | -0.891 | 2.091 | 0.4263 |
| Proton | 0.5 | 16 | 1.399  | 0.724 | -0.037 | 2.836 | 0.0561 |
| Proton | 0.5 | 20 | 0.201  | 0.788 | -1.363 | 1.764 | 0.7997 |
| Proton | 1   | 0  | 0.900  | 0.662 | -0.413 | 2.213 | 0.1769 |
| Proton | 1   | 4  | 1.003  | 0.662 | -0.311 | 2.316 | 0.1329 |
| Proton | 1   | 8  | 0.502  | 0.662 | -0.812 | 1.815 | 0.4501 |
| Proton | 1   | 12 | 0.700  | 0.662 | -0.613 | 2.013 | 0.2926 |
| Proton | 1   | 16 | 1.299  | 0.662 | -0.014 | 2.612 | 0.0525 |
| Proton | 1   | 20 | 0.199  | 0.662 | -1.114 | 1.513 | 0.7640 |
| Proton | 2   | 0  | 0.599  | 0.686 | -0.761 | 1.959 | 0.3845 |
| Proton | 2   | 4  | 1.102  | 0.686 | -0.258 | 2.462 | 0.1112 |
| Proton | 2   | 8  | 0.198  | 0.686 | -1.162 | 1.559 | 0.7728 |
| Proton | 2   | 12 | 1.099  | 0.686 | -0.261 | 2.459 | 0.1121 |
| Proton | 2   | 16 | 1.700  | 0.686 | 0.340  | 3.060 | 0.0148 |
| Proton | 2   | 20 | -0.099 | 0.686 | -1.460 | 1.261 | 0.8852 |
| Carbon | 0.1 | 0  | 1.300  | 1.064 | -0.811 | 3.411 | 0.2248 |
| Carbon | 0.1 | 4  | 1.599  | 1.064 | -0.512 | 3.710 | 0.1362 |
| Carbon | 0.1 | 8  | 1.499  | 1.064 | -0.612 | 3.610 | 0.1621 |
| Carbon | 0.1 | 12 | 0.900  | 1.064 | -1.211 | 3.011 | 0.3997 |
| Carbon | 0.1 | 16 | 3.499  | 1.064 | 1.388  | 5.610 | 0.0014 |
| Carbon | 0.1 | 20 | 1.899  | 1.064 | -0.212 | 4.011 | 0.0773 |
| Carbon | 0.5 | 0  | 1.301  | 1.063 | -0.807 | 3.410 | 0.2237 |
| Carbon | 0.5 | 4  | 0.700  | 1.063 | -1.409 | 2.808 | 0.5118 |
| Carbon | 0.5 | 8  | 1.702  | 1.063 | -0.407 | 3.810 | 0.1125 |
| Carbon | 0.5 | 12 | 1.301  | 1.063 | -0.808 | 3.409 | 0.2239 |
| Carbon | 0.5 | 16 | 2.698  | 1.063 | 0.590  | 4.807 | 0.0127 |
| Carbon | 0.5 | 20 | 0.900  | 1.063 | -1.209 | 3.008 | 0.3993 |
| Carbon | 1   | 0  | 0.703  | 0.936 | -1.155 | 2.561 | 0.4545 |
| Carbon | 1   | 4  | 0.801  | 0.936 | -1.057 | 2.658 | 0.3945 |
| Carbon | 1   | 8  | 0.700  | 0.936 | -1.158 | 2.558 | 0.4564 |
| Carbon | 1   | 12 | 0.301  | 0.936 | -1.557 | 2.159 | 0.7485 |
| Carbon | 1   | 16 | 2.400  | 0.936 | 0.542  | 4.258 | 0.0119 |
| Carbon | 1   | 20 | 0.001  | 0.936 | -1.857 | 1.859 | 0.9994 |
| Carbon | 2   | 0  | 0.702  | 0.969 | -1.221 | 2.625 | 0.4709 |
| Carbon | 2   | 4  | 0.900  | 0.969 | -1.023 | 2.823 | 0.3556 |
| Carbon | 2   | 8  | 0.901  | 0.969 | -1.022 | 2.824 | 0.3546 |

|        |     |    |        |       |        |       |        |
|--------|-----|----|--------|-------|--------|-------|--------|
| Carbon | 2   | 12 | -0.601 | 0.969 | -2.524 | 1.322 | 0.5368 |
| Carbon | 2   | 16 | 1.199  | 0.969 | -0.724 | 3.122 | 0.2190 |
| Carbon | 2   | 20 | 0.000  | 0.969 | -1.923 | 1.923 | 1.0000 |
| Iron   | 0.1 | 0  | 0.898  | 1.065 | -1.214 | 3.010 | 0.4010 |
| Iron   | 0.1 | 4  | 1.001  | 1.065 | -1.111 | 3.113 | 0.3493 |
| Iron   | 0.1 | 8  | 1.302  | 1.065 | -0.810 | 3.413 | 0.2243 |
| Iron   | 0.1 | 12 | 1.301  | 1.065 | -0.811 | 3.413 | 0.2245 |
| Iron   | 0.1 | 16 | 3.499  | 1.065 | 1.387  | 5.610 | 0.0014 |
| Iron   | 0.1 | 20 | 0.202  | 1.065 | -1.910 | 2.314 | 0.8499 |
| Iron   | 0.5 | 0  | 0.901  | 1.063 | -1.208 | 3.010 | 0.3985 |
| Iron   | 0.5 | 4  | 0.601  | 1.063 | -1.508 | 2.710 | 0.5729 |
| Iron   | 0.5 | 8  | 0.504  | 1.063 | -1.605 | 2.613 | 0.6365 |
| Iron   | 0.5 | 12 | 1.397  | 1.063 | -0.712 | 3.506 | 0.1918 |
| Iron   | 0.5 | 16 | 2.299  | 1.063 | 0.191  | 4.408 | 0.0329 |
| Iron   | 0.5 | 20 | 0.101  | 1.063 | -2.008 | 2.210 | 0.9246 |
| Iron   | 1   | 0  | 0.200  | 0.936 | -1.658 | 2.058 | 0.8312 |
| Iron   | 1   | 4  | 0.200  | 0.936 | -1.657 | 2.058 | 0.8310 |
| Iron   | 1   | 8  | 0.700  | 0.936 | -1.158 | 2.557 | 0.4565 |
| Iron   | 1   | 12 | 0.800  | 0.936 | -1.057 | 2.658 | 0.3945 |
| Iron   | 1   | 16 | 3.499  | 0.936 | 1.641  | 5.357 | 0.0003 |
| Iron   | 1   | 20 | 1.802  | 0.936 | -0.055 | 3.660 | 0.0571 |
| Iron   | 2   | 0  | 0.699  | 0.970 | -1.225 | 2.623 | 0.4729 |
| Iron   | 2   | 4  | 0.202  | 0.970 | -1.722 | 2.126 | 0.8357 |
| Iron   | 2   | 8  | 0.702  | 0.970 | -1.222 | 2.626 | 0.4709 |
| Iron   | 2   | 12 | 0.800  | 0.970 | -1.124 | 2.724 | 0.4114 |
| Iron   | 2   | 16 | 3.999  | 0.970 | 2.075  | 5.923 | 0.0001 |
| Iron   | 2   | 20 | 3.100  | 0.970 | 1.176  | 5.024 | 0.0019 |

\* change in mean cell diameter (microns)
